# Supplementary material
Source: publisher figshare collection journal article supplement (https://acs.figshare.com/ndownloader/files/6000429)
Supplement: Supplementary file 1 [file 6000429]

## **Supporting Information**

# Molecular Level Understanding of Biological Systems with High Motional Heterogeneity in Its Absolute Native State

*Chandan Singh<sup>1</sup>, Rudra N. Purusottam<sup>1,3</sup>, Akhila Viswan<sup>1,2</sup> and Neeraj Sinha<sup>\*1</sup>.*

*<sup>1</sup>Centre of Biomedical Research, SGPGIMS Campus, Raebareilly Road, Lucknow – 226014  
INDIA*

*<sup>2</sup>Faculty of Engineering and Technology, Dr. A. P. J Abdul Kalam Technical University,  
Lucknow 226021, India*

### **Corresponding Author**

\*Author to whom correspondence should be addressed

e-mail: [neerajcbmr@gmail.com](mailto:neerajcbmr@gmail.com) , [neeraj.sinha@cbmr.res.in](mailto:neeraj.sinha@cbmr.res.in)

Phone: +91 – 522 – 2495032, Fax: +91 – 522 – 2668215

<sup>3</sup>*Present address:*

*Department of Chemistry and Biochemistry, The Ohio State University*

### Sensitivity enhanced $^{13}\text{C}$ spectrum of hydrated native cartilage:

If we compare the  $^{13}\text{C}$  spectra recorded with equal number of scans and same relaxation delay, we get more drastic results in sensitivity enhancement as shown in **SI Figure 1**.

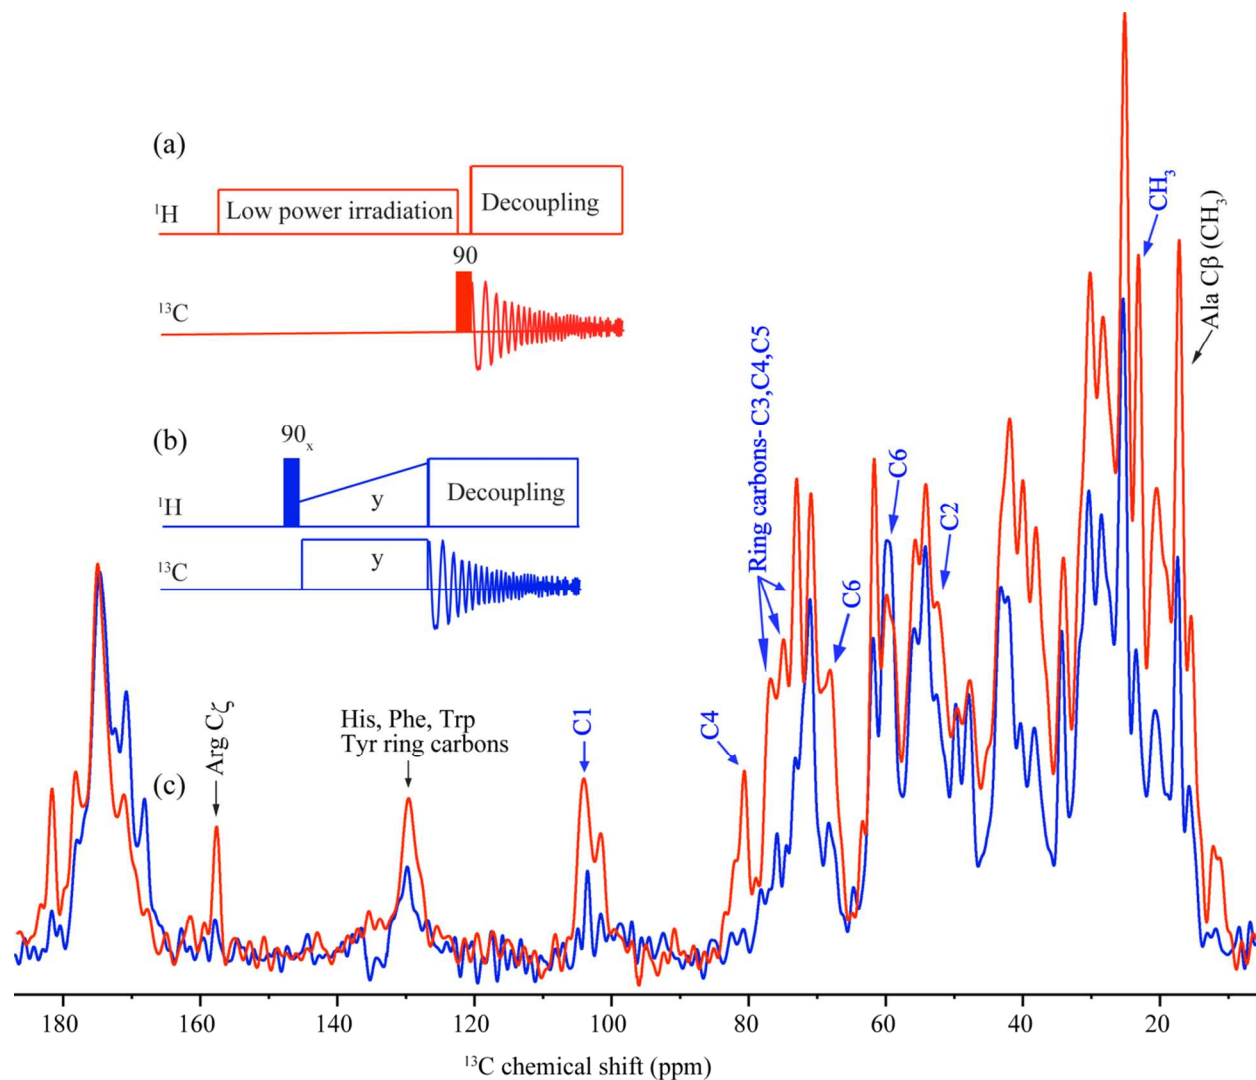

**SI Figure 1.** The comparison of heteronuclear Overhauser enhancement along with equilibration of magnetization by low power irradiation (**SI Figure 1(a)** red colour) and the  $^{13}\text{C}$  spectra recorded by CPMAS (**SI Figure 1(b)** blue colour) was recorded in equal time ( $\sim 6$  hours each), 5 s RD, with 4300 and 3072 scans respectively (**SI Figure 1(c)**)

**$^{13}\text{C}$  spectrum of hydrated native cartilage recorded with one pulse is time consuming:**

$^{13}\text{C}$  CPMAS is preferred over  $^{13}\text{C}$  one pulse experiment as it provides similar sensitivity in 4-5 times lesser time as shown in **SI Figure 2**.

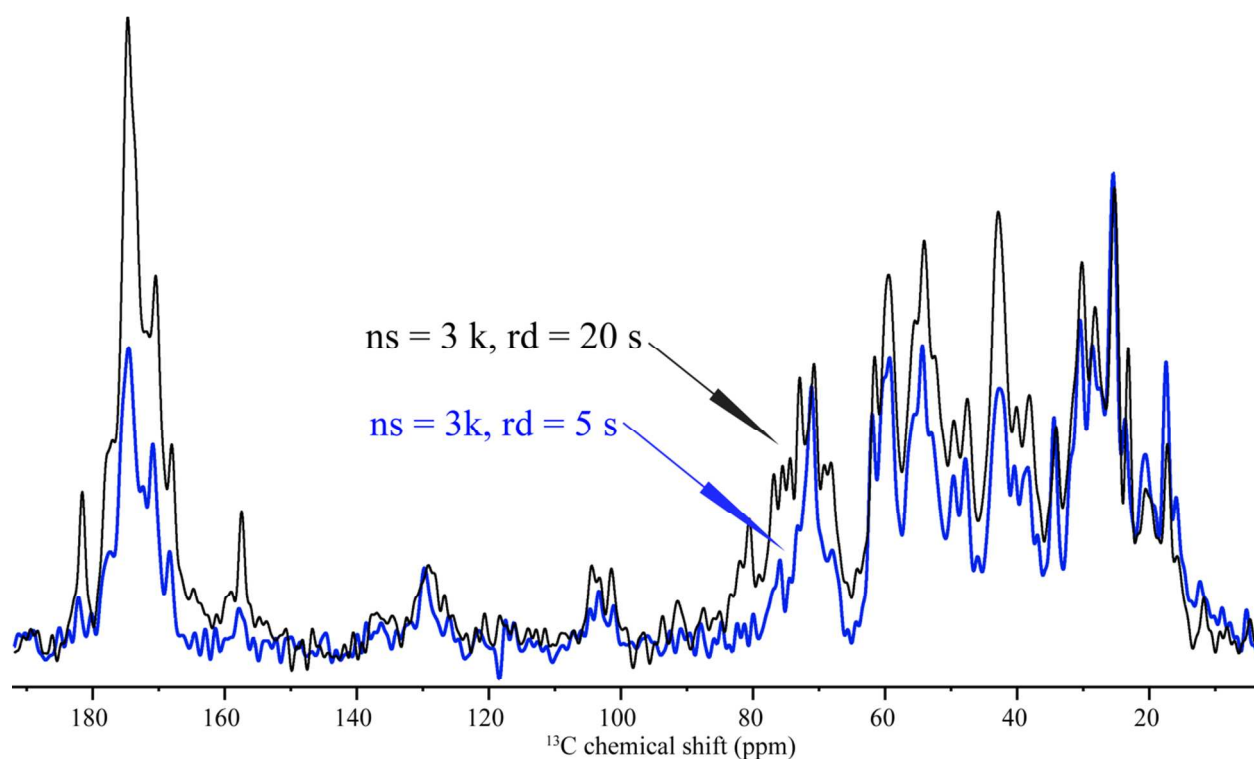

**SI Figure 2.** The spectra recorded with one pulse sequence (black color) **SI Figure 2** and CPMAS (blue color) **Figure 3** are shown here. Equal numbers of scans (3072) are recorded for each spectrum. Relaxation delay of 20 s and 5 s are used to record these spectra

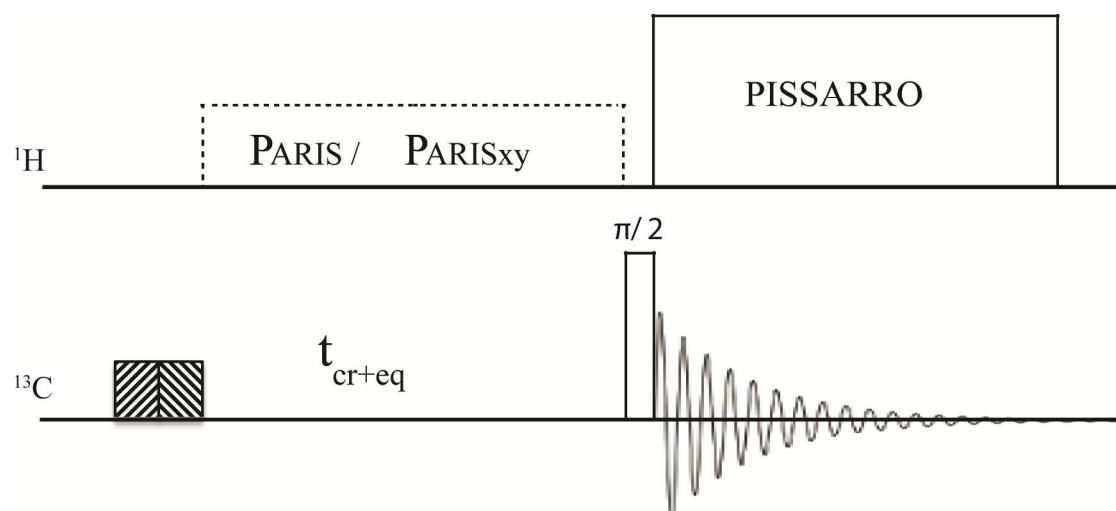

**SI Figure 3:** The Overhauser enhancements along with equilibration of magnetization by low power irradiation method pulse sequence, used in this study to enhance sensitivity of  $^{13}\text{C}$  resonances.

## References:

- 1 Naji, L.; Kaufmann, J.; Huster, D.; Schiller, J.; Arnold, K. <sup>13</sup>C NMR Relaxation Studies on Cartilage and Cartilage Components. *Carbohydr. Res.* **2000**, 327, 439-446.
- 2 Huster, D. In *Annual Reports on NMR Spectroscopy*; Graham, A. W., Ed., Academic Press: **2008**; Vol. 64, pp 127-159.
- 3 Chow, W. Y.; Rajan, R.; Muller, K. H.; Reid, D. G.; Skepper, J. N.; Wong, W. C.; Brooks, R. A.; Green, M.; Bihan, D.; Farndale, R. W.; Slatter, D. A.; Shanahan, C. M.; Duer, M. J. NMR Spectroscopy of Native and in Vitro Tissues Implicates PolyADP Ribose in Biomineralization. *Science* **2014**, 344, 742-746.
